# Supplementary material
Source: PubMed Central journal article supplement (PMC3025728)
Supplement: supp_mcq226_mcq226supp.pdf [file supp_mcq226_mcq226supp.pdf]

## SUPPLEMENTARY DATA

GenBank accession numbers of species used in phylogenetic analysis of ITS data

| Species                                                                  | GenBank accession number |
|--------------------------------------------------------------------------|--------------------------|
| <i>Amphipogon amphipogonoides</i> (Steud.) Vickery                       | AF019850                 |
| <i>Amphipogon caricinus</i> F. Muell.                                    | AF019849                 |
| <i>Amphipogon strictus</i> R. Br.                                        | AF019848                 |
| <i>Aniselytron treutleri</i> (Kuntze) Soják                              | EU792373                 |
| <i>Arctopoa tibetica</i> (Munro ex Stapf) Prob.                          | EU792370                 |
| <i>Aristida adscensionis</i> L.                                          | DQ171976                 |
| <i>Aristida havardii</i> Vasey                                           | AF019846                 |
| <i>Aristida superpendens</i> Domin                                       | AF019847                 |
| <i>Arundo donax</i> L.                                                   | DQ172077                 |
| <i>Austrodanthonia penicillata</i> (Labill.) H.P. Linder                 | GU359183                 |
| <i>Centropodia glauca</i> (Nees) Cope                                    | EU401280                 |
| <i>Chasmanthium latifolium</i> (Michx.) H.O. Yates                       | DQ006028                 |
| <i>Chionochloa frigida</i> (Vickery) Conert                              | AF019868                 |
| <i>Chloris truncata</i> R. Br.                                           | EF153032                 |
| <i>Cyperochloa hirsuta</i> Lazarides & L. Watson                         | AF019856                 |
| <i>Diplopogon setaceus</i> R. Br.                                        | AF019851                 |
| <i>Distichlis eludens</i> (Soderstr. & H.F. Decker) H.L. Bell & Columbus | EF196901                 |
| <i>Dregeochloa pumila</i> (Nees) Conert                                  | AF019853                 |
| <i>Echinochloa crus-galli</i> (L.) P. Beauv.                             | AM404346                 |
| <i>Ectrosia leporine</i> R. Br.                                          | EF153041                 |
| <i>Eragrostis pectinacea</i> (Michx.) Nees                               | EF153047                 |
| <i>Eragrostis sessilispica</i> Buckley                                   | EF153049                 |
| <i>Eriachne rara</i> R. Br.                                              | AF019860                 |
| <i>Gynerium sagittatum</i> (Aubl.) P. Beauv.                             | AF019858                 |
| <i>Hackelochloa granularis</i> (L.) Kuntze                               | DQ172081                 |
| <i>Joycea pallid</i> (R. Br.) H.P. Linder                                | AF019879                 |
| <i>Karoochloa purpurea</i> (L. f.) Conert & Türpe                        | AF019874                 |
| <i>Merxmuellera dura</i> (Stapf) Conert                                  | AF019872                 |
| <i>Merxmuellera macowanii</i> (Stapf) Conert                             | AF019863                 |
| <i>Merxmuellera rangei</i> (Pilg.) Conert                                | AF019862                 |
| <i>Merxmuellera setacea</i> N. P. Barker                                 | AF019867                 |
| <i>Merxmuellera stricta</i> (Schrad.) Conert                             | AF019871                 |
| <i>Micraira subulifolia</i> F. Muell.                                    | AF019859                 |
| <i>Molinia caerulea</i> (L.) Moench                                      | AF019857                 |
| <i>Monachather paradoxa</i> Steud.                                       | AF019852                 |
| <i>Neyraudia reynaudiana</i> (Kunth) Keng ex Hitchc.                     | GU359124                 |
| <i>Notochloe microdon</i> (Benth.) Domin                                 | AF019869                 |

|                                                           |          |
|-----------------------------------------------------------|----------|
| <i>Notodanthonia laevis</i> (Vickery) Zotov               | AF019875 |
| <i>Orthoclada laxa</i> (Rich.) P. Beauv.                  | AM404344 |
| <i>Panicum hirticaule</i> J. Presl                        | DQ172082 |
| <i>Pentameris macrocalycina</i> (Steud.) Schweick.        | AF019864 |
| <i>Pentaschistis aspera</i> (Thunb.) Stapf                | AF019865 |
| <i>Phragmites australis</i> (Cav.) Trin. ex Steud.        | AF019810 |
| <i>Phragmites japonicas</i> Steud.                        | FJ766175 |
| <i>Plinthanthesis paradoxa</i> (R. Br.) S.T. Blake        | AF019870 |
| <i>Pogonarthria squarrosa</i> (Roem. & Schult.) Pilg.     | EF153075 |
| <i>Prionanthium ecklonii</i> (Nees) Stapf                 | AF019866 |
| <i>Rytidosperma nudiflorum</i> (P. Morris) Connor & Edgar | AF019876 |
| <i>Saccharum officinarum</i> L.                           | AJ876760 |
| <i>Schismus barbatus</i> (L.) Thell.                      | AF019873 |
| <i>Spartochloa scirpoidea</i> (Steud.) C.E. Hubb.         | AF019855 |
| <i>Stipagrostis zeyheri</i> (Nees) De Winter              | AF019845 |
| <i>Thysanolaena maxima</i> (Roxb.) Kuntze                 | AF019854 |
| <i>Triraphis mollis</i> R. Br.                            | GU359187 |
| <i>Uniola paniculata</i> L.                               | EF153096 |
| <i>Zeugites hackelii</i> Swallen                          | AM404340 |
| <i>Zoysia matrella</i> (L.) Merr.                         | EF153099 |

---
